# Supplementary material for: Absorption behavior of doxorubicin hydrochloride in visible region in different environments: a combined experimental and computational study
Source: Royal Society of Chemistry journal article supplement (doi:10.1039/d1cp05182b), 2022-01-01
Supplement: d1cp05182b1.pdf [file d1cp05182b1.pdf]

# Electronic Supplementary Information: Absorption behavior of doxorubicin hydrochloride in Visible region in different environments: a combined experimental and computational study

Cheng Giuseppe Chen<sup>a,‡</sup>, Alessandro Nicola Nardi<sup>a,‡</sup>, Mauro Giustini<sup>a</sup>, and  
Marco D'Abramo<sup>\*a</sup>

<sup>a</sup>Department of Chemistry, Sapienza University of Rome, Rome, Italy

<sup>‡</sup>These authors contributed equally to this work

---

\*marco.dabramo@uniroma1.it

# Contents

|          |                                |           |
|----------|--------------------------------|-----------|
| <b>1</b> | <b>Additional Informations</b> | <b>3</b>  |
| <b>2</b> | <b>Force Field Parameters</b>  | <b>10</b> |
| 2.1      | Doxorubicin . . . . .          | 10        |
| 2.2      | <i>n</i> -hexane . . . . .     | 20        |
|          | <b>Bibliography</b>            | <b>25</b> |

# 1 Additional Informations

Table S1: The unperturbed vertical excitation energies,  $E_{exc}^{imp}$  (in water and  $n$ -hexane solutions), are reported in the second column. The unperturbed,  $|\mu^{imp}|^2$ , and mean perturbed  $|\mu^{pert}|^2$  electronic transition dipole square length in the calculated spectra (in water and  $n$ -hexane solutions) are showed in the third and fourth columns respectively. The shift between the unperturbed and the (mean) perturbed excitation energies,  $E_{exc}^{imp} - \langle E_{exc}^{pert} \rangle$ , are reported in the last column.

| Transition        | $E_{exc}^{imp}$ | $ \mu^{imp} ^2$ | $ \mu^{pert} ^2$ | $E_{exc}^{imp} - \langle E_{exc}^{pert} \rangle$ |
|-------------------|-----------------|-----------------|------------------|--------------------------------------------------|
| Units             | $eV$            | $a.u.$          | $a.u.$           | $eV$                                             |
| Water sol.        |                 |                 |                  |                                                  |
| 0 $\rightarrow$ 1 | 2.59            | 3.06            | 2.08             | 0.11                                             |
| 0 $\rightarrow$ 2 | 2.98            | 0.00            | 0.40             | 0.06                                             |
| 0 $\rightarrow$ 3 | 3.19            | 0.52            | 0.42             | 0.14                                             |
| 0 $\rightarrow$ 4 | 3.43            | 0.00            | 0.46             | 0.20                                             |
| 0 $\rightarrow$ 5 | 3.66            | 0.06            | 0.09             | 0.25                                             |
| <hr/>             |                 |                 |                  |                                                  |
| $n$ -hexane sol.  |                 |                 |                  |                                                  |
| Conformation A    |                 |                 |                  |                                                  |
| 0 $\rightarrow$ 1 | 2.59            | 3.06            | 2.37             | -0.08                                            |
| 0 $\rightarrow$ 2 | 2.98            | 0.00            | 0.00             | -0.03                                            |
| 0 $\rightarrow$ 3 | 3.19            | 0.52            | 0.99             | 0.12                                             |
| 0 $\rightarrow$ 4 | 3.43            | 0.00            | 0.00             | 0.00                                             |
| 0 $\rightarrow$ 5 | 3.66            | 0.06            | 0.08             | 0.03                                             |
| Conformation B    |                 |                 |                  |                                                  |
| 0 $\rightarrow$ 1 | 2.74            | 1.52            | 2.71             | 0.21                                             |
| 0 $\rightarrow$ 2 | 2.86            | 1.18            | 0.05             | -0.03                                            |
| 0 $\rightarrow$ 3 | 3.24            | 0.26            | 0.00             | 0.02                                             |
| 0 $\rightarrow$ 4 | 3.26            | 0.28            | 0.46             | -0.22                                            |
| 0 $\rightarrow$ 5 | 3.81            | 0.01            | 0.22             | 0.10                                             |

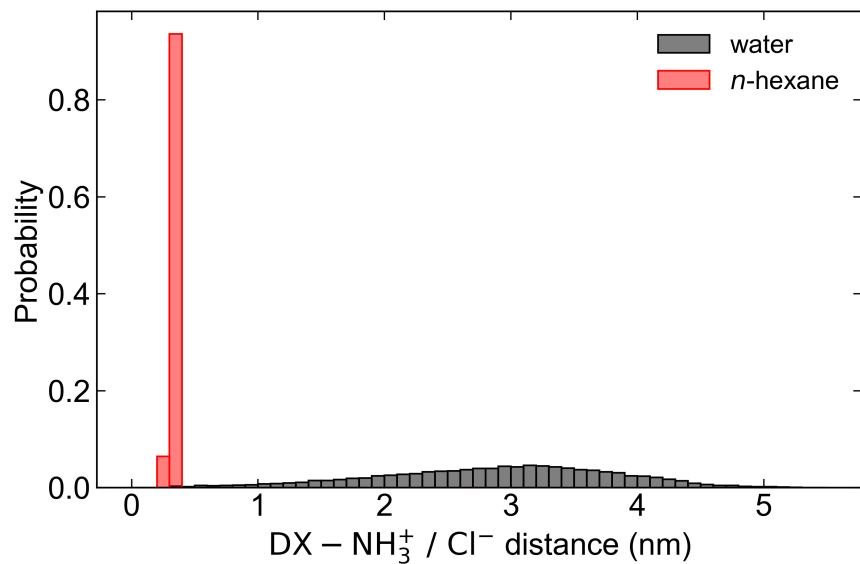

Figure S1: Distances distributions between the DX ammonium group and  $Cl^-$  ion in the MD simulations in water (black) and in *n*-hexane (red).

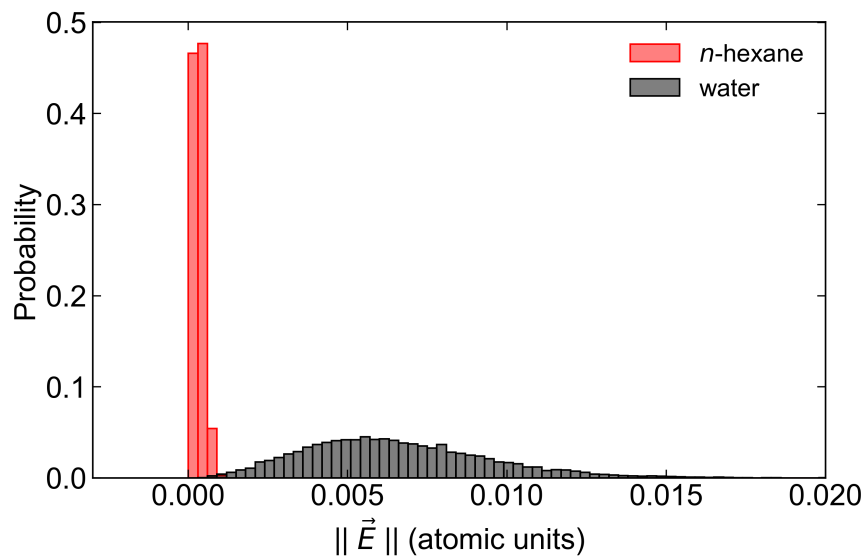

Figure S2: Probability distributions of the electric field magnitude generated by the solvent (water: black; *n*-hexane: red) along the MD simulations of DX.

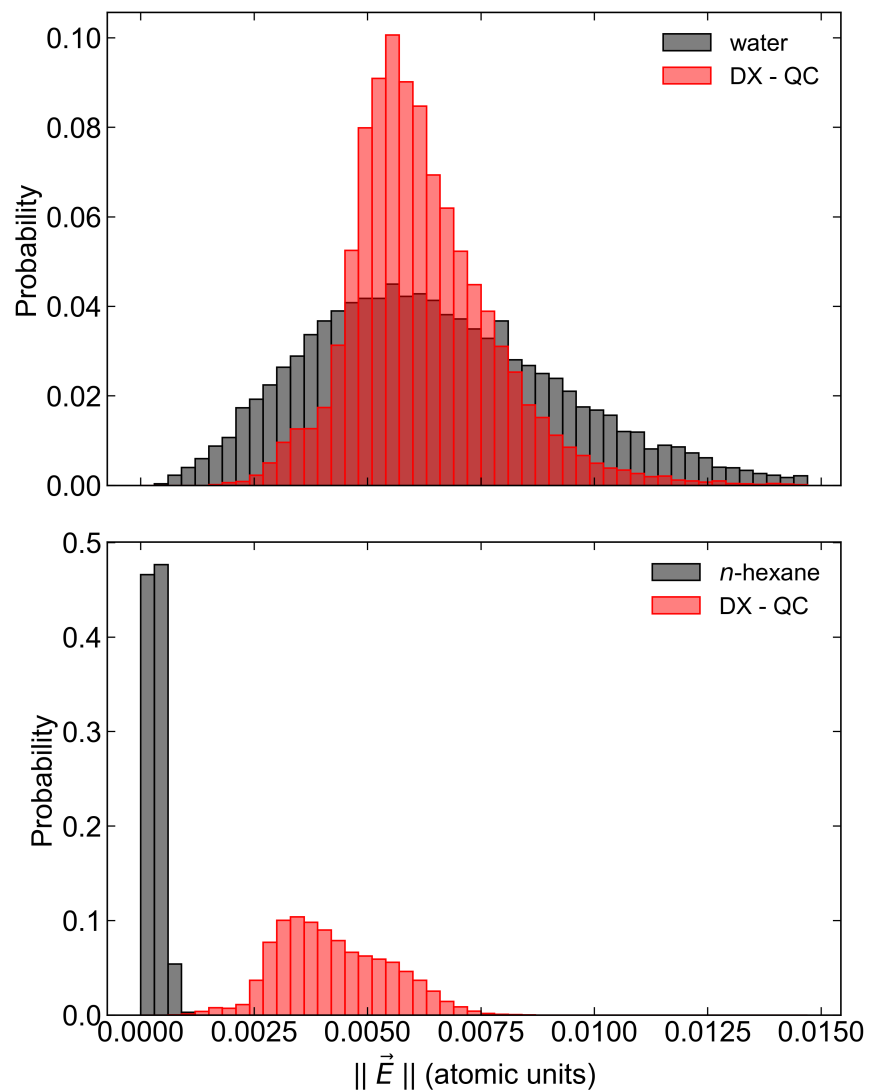

Figure S3: Probability distributions of the electric field magnitude generated by the solvent (black) and by the portion of DX not included in the QC (DX-QC; red), obtained by the MD simulations. Top: DX in water; bottom: DX in *n*-hexane. DX-QC indicates the contribution due to both the  $Cl^-$  ion and the atoms belonging to the portion of DX not included in the QC.

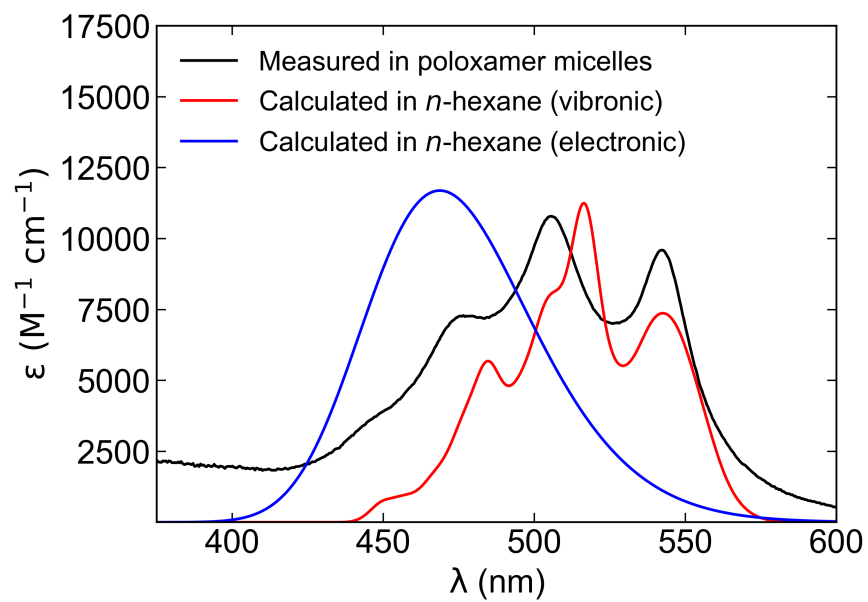

Figure S4: Calculated vertical and vibronic Vis spectra for DX in apolar environment (blue and red, respectively) in comparison with the experimental one measured in sodium cholate/F127 poloxamer mixed micelles (black).

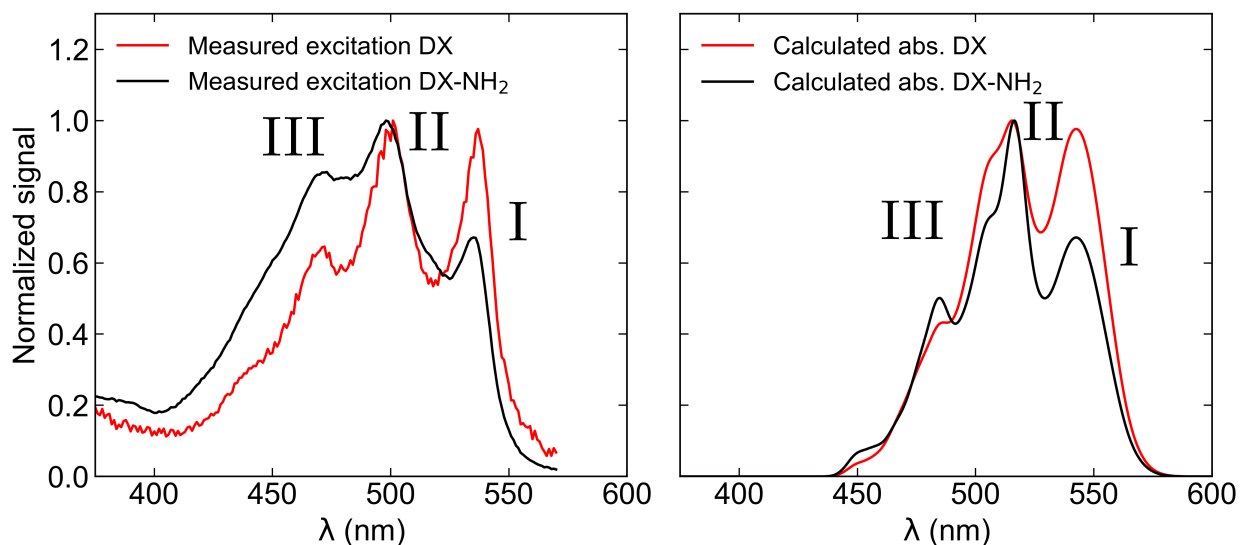

Figure S5: Fluorescence excitation spectra (left) and calculated Vis spectra (right) in *n*-hexane (both normalized) for DX in the cationic form (red) and in the neutral form (DX-NH<sub>2</sub>; black). DX-NH<sub>2</sub> has been prepared from a 0.5 mM DX solution in 50 mM Tris·HCl buffer (pH = pK<sub>a</sub><sup>NH<sub>3</sub><sup>+</sup></sup> = 8.6 - pK<sub>a</sub> value taken from<sup>1</sup>) stratified over chloroform and left in mild stirring overnight. 100 μL of the organic phase was then dried under vacuum and 1 mL of *n*-hexane added. After stirring and centrifuging, the supernatant was placed into a fluorescence cuvette and the excitation spectrum acquired as described in the Materials and Methods section of the main manuscript. The calculated spectra were obtained by the weighted summation of the contributions arising from the conformation A and B. The weighting factors were obtained by minimizing the differences between the predicted and measured values of the ratios of the signal intensities I and II and of the signal intensities III and II (for DX: 14% of A conformation and 86% of B conformation; for DX-NH<sub>2</sub>: 31% of A conformation and 69% of B conformation).

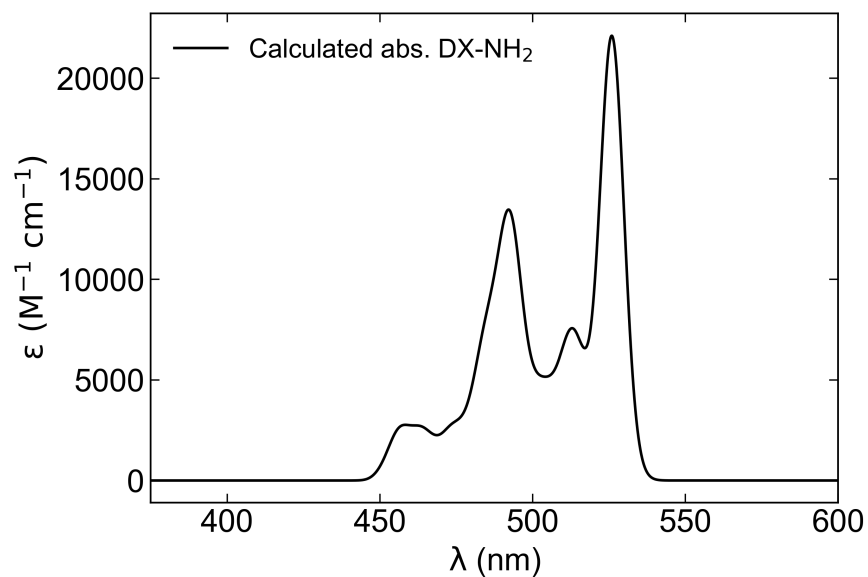

Figure S6: Calculated Vis spectrum of DX-NH<sub>2</sub> in *n*-hexane. It is worth noting the close analogy with the calculated Vis spectrum of DX in *n*-hexane when only the A conformer is considered (cfr. Fig. 4 in the main manuscript).

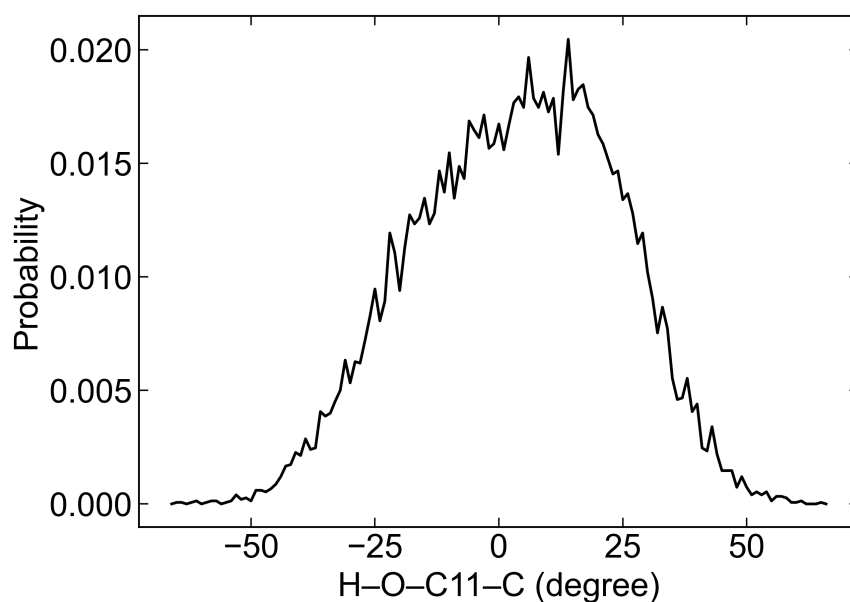

Figure S7: Probability distribution of the dihedral angle H-O-C11-C (cfr. Fig. 1 in the main manuscript for DX atom numbering) sampled during the MD simulation of DX-NH<sub>2</sub>. It is worth to remark that only the A conformation is sampled.



Table S2: The root mean square electron-hole separation ( $d_{exc}$ ) and the linear electron hole distance ( $d_{e \rightarrow h}$ ) for the first six transitions of both A and B conformations of the QC are reported.

| Transition        | $d_{exc}$ (Å) | $d_{e \rightarrow h}$ (Å) |
|-------------------|---------------|---------------------------|
| Conformation A    |               |                           |
| 0 $\rightarrow$ 1 | 4.25          | 1.58                      |
| 0 $\rightarrow$ 2 | 3.75          | 1.08                      |
| 0 $\rightarrow$ 3 | 4.48          | 2.32                      |
| 0 $\rightarrow$ 4 | 3.54          | 0.87                      |
| 0 $\rightarrow$ 5 | 4.12          | 0.07                      |
| 0 $\rightarrow$ 6 | 4.65          | 2.48                      |
| Conformation B    |               |                           |
| 0 $\rightarrow$ 1 | 3.98          | 1.03                      |
| 0 $\rightarrow$ 2 | 3.89          | 0.89                      |
| 0 $\rightarrow$ 3 | 4.07          | 1.45                      |
| 0 $\rightarrow$ 4 | 3.98          | 1.31                      |
| 0 $\rightarrow$ 5 | 4.07          | 0.22                      |
| 0 $\rightarrow$ 6 | 4.69          | 2.46                      |

## 2 Force Field Parameters

The following parameters for the DX and *n*-hexane molecules were obtained using ATB (Automated Topology Builder)<sup>2</sup> in a form which is compatible with the GROMACS software<sup>3</sup>. For further clarifications about the definitions of said parameters, we recommend reading the work of Schmid et al.<sup>4</sup>.

### 2.1 Doxorubicin

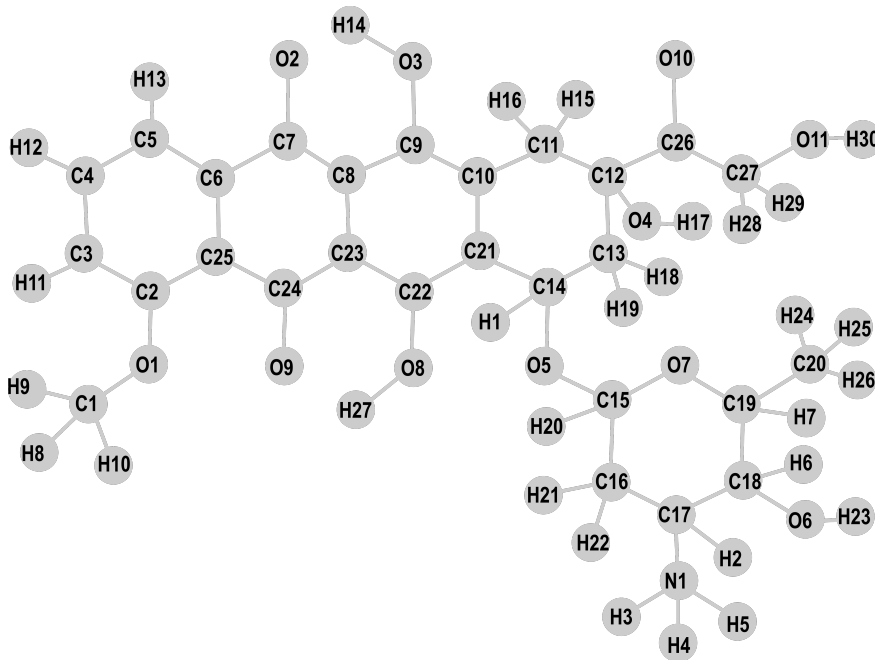

Figure S8: Atom names of the DX molecule in the force field.

Table S3: Parameters for the non bonded interactions of the DX molecule.  $C_6$  and  $C_{12}$  are the parameters of the Lennard Jones interactions.

| Index | Atom name | Atom type | Mass (Da) | Charge (e) | $C_6$<br>(kJ mol <sup>-1</sup> nm <sup>6</sup> ) | $C_{12}$<br>(kJ mol <sup>-1</sup> nm <sup>12</sup> ) |
|-------|-----------|-----------|-----------|------------|--------------------------------------------------|------------------------------------------------------|
| 1     | H30       | H         | 1.0080    | 0.239      | 0                                                | 0                                                    |
| 2     | O11       | OA        | 15.9994   | -0.299     | 0.0022619536                                     | $1.505529 \cdot 10^{-6}$                             |
| 3     | C27       | C         | 12.0110   | -0.068     | 0.0023406244                                     | $4.937284 \cdot 10^{-6}$                             |
| 4     | H28       | HC        | 1.0080    | 0.145      | $8.464 \cdot 10^{-5}$                            | $1.5129 \cdot 10^{-8}$                               |
| 5     | H29       | HC        | 1.0080    | 0.091      | $8.464 \cdot 10^{-5}$                            | $1.5129 \cdot 10^{-8}$                               |

|    |     |      |         |        |                       |                          |
|----|-----|------|---------|--------|-----------------------|--------------------------|
| 6  | C26 | C    | 12.0110 | 0.175  | 0.0023406244          | $4.937284 \cdot 10^{-6}$ |
| 7  | O10 | O    | 15.9994 | -0.283 | 0.0022619536          | $1 \cdot 10^{-6}$        |
| 8  | C12 | C    | 12.0110 | 0.049  | 0.0023406244          | $4.937284 \cdot 10^{-6}$ |
| 9  | O4  | OA   | 15.9994 | -0.311 | 0.0022619536          | $1.505529 \cdot 10^{-6}$ |
| 10 | H17 | HS14 | 1.0080  | 0.188  | 0.0                   | 0.0                      |
| 11 | C13 | C    | 12.0110 | -0.156 | 0.0023406244          | $4.937284 \cdot 10^{-6}$ |
| 12 | H18 | HC   | 1.0080  | 0.114  | $8.464 \cdot 10^{-5}$ | $1.5129 \cdot 10^{-8}$   |
| 13 | H19 | HC   | 1.0080  | 0.116  | $8.464 \cdot 10^{-5}$ | $1.5129 \cdot 10^{-8}$   |
| 14 | C11 | C    | 12.0110 | -0.150 | 0.0023406244          | $4.937284 \cdot 10^{-6}$ |
| 15 | H15 | HC   | 1.0080  | 0.138  | $8.464 \cdot 10^{-5}$ | $1.5129 \cdot 10^{-8}$   |
| 16 | H16 | HC   | 1.0080  | 0.121  | $8.464 \cdot 10^{-5}$ | $1.5129 \cdot 10^{-8}$   |
| 17 | C10 | C    | 12.0110 | -0.042 | 0.0023406244          | $4.937284 \cdot 10^{-6}$ |
| 18 | C21 | C    | 12.0110 | -0.067 | 0.0023406244          | $4.937284 \cdot 10^{-6}$ |
| 19 | C9  | C    | 12.0110 | 0.129  | 0.0023406244          | $4.937284 \cdot 10^{-6}$ |
| 20 | O3  | OA   | 15.9994 | -0.255 | 0.0022619536          | $1.505529 \cdot 10^{-6}$ |
| 21 | H14 | HS14 | 1.0080  | 0.291  | 0.0                   | 0.0                      |
| 22 | C8  | C    | 12.0110 | -0.165 | 0.0023406244          | $4.937284 \cdot 10^{-6}$ |
| 23 | C23 | C    | 12.0110 | -0.154 | 0.0023406244          | $4.937284 \cdot 10^{-6}$ |
| 24 | C22 | C    | 12.0110 | 0.110  | 0.0023406244          | $4.937284 \cdot 10^{-6}$ |
| 25 | O8  | OA   | 15.9994 | -0.287 | 0.0022619536          | $1.505529 \cdot 10^{-6}$ |
| 26 | H27 | HS14 | 1.0080  | 0.255  | 0.0                   | 0.0                      |
| 27 | C24 | C    | 12.0110 | 0.386  | 0.0023406244          | $4.937284 \cdot 10^{-6}$ |
| 28 | O9  | O    | 15.9994 | -0.310 | 0.0022619536          | $1 \cdot 10^{-6}$        |
| 29 | C25 | C    | 12.0110 | -0.152 | 0.0023406244          | $4.937284 \cdot 10^{-6}$ |
| 30 | C2  | C    | 12.0110 | 0.152  | 0.0023406244          | $4.937284 \cdot 10^{-6}$ |
| 31 | C3  | C    | 12.0110 | -0.188 | 0.0023406244          | $4.937284 \cdot 10^{-6}$ |
| 32 | H11 | HC   | 1.0080  | 0.101  | $8.464 \cdot 10^{-5}$ | $1.5129 \cdot 10^{-8}$   |
| 33 | C4  | C    | 12.0110 | -0.067 | 0.0023406244          | $4.937284 \cdot 10^{-6}$ |
| 34 | H12 | HC   | 1.0080  | 0.154  | $8.464 \cdot 10^{-5}$ | $1.5129 \cdot 10^{-8}$   |
| 35 | C5  | C    | 12.0110 | -0.113 | 0.0023406244          | $4.937284 \cdot 10^{-6}$ |
| 36 | H13 | HC   | 1.0080  | 0.168  | $8.464 \cdot 10^{-5}$ | $1.5129 \cdot 10^{-8}$   |
| 37 | C6  | C    | 12.0110 | -0.076 | 0.0023406244          | $4.937284 \cdot 10^{-6}$ |
| 38 | C7  | C    | 12.0110 | 0.322  | 0.0023406244          | $4.937284 \cdot 10^{-6}$ |
| 39 | O2  | O    | 15.9994 | -0.301 | 0.0022619536          | $1 \cdot 10^{-6}$        |
| 40 | O1  | OE   | 15.9994 | -0.188 | 0.0022619536          | $1.21 \cdot 10^{-6}$     |
| 41 | C1  | C    | 12.0110 | -0.094 | 0.0023406244          | $4.937284 \cdot 10^{-6}$ |

|    |     |      |         |        |                       |                          |
|----|-----|------|---------|--------|-----------------------|--------------------------|
| 42 | H8  | HC   | 1.0080  | 0.094  | $8.464 \cdot 10^{-5}$ | $1.5129 \cdot 10^{-8}$   |
| 43 | H9  | HC   | 1.0080  | 0.094  | $8.464 \cdot 10^{-5}$ | $1.5129 \cdot 10^{-8}$   |
| 44 | H10 | HC   | 1.0080  | 0.094  | $8.464 \cdot 10^{-5}$ | $1.5129 \cdot 10^{-8}$   |
| 45 | C14 | C    | 12.0110 | 0.093  | 0.0023406244          | $4.937284 \cdot 10^{-6}$ |
| 46 | H1  | HC   | 1.0080  | 0.141  | $8.464 \cdot 10^{-5}$ | $1.5129 \cdot 10^{-8}$   |
| 47 | O5  | OE   | 15.9994 | -0.311 | 0.0022619536          | $1.21 \cdot 10^{-6}$     |
| 48 | C15 | C    | 12.0110 | 0.195  | 0.0023406244          | $4.937284 \cdot 10^{-6}$ |
| 49 | H20 | HC   | 1.0080  | 0.167  | $8.464 \cdot 10^{-5}$ | $1.5129 \cdot 10^{-8}$   |
| 50 | O7  | OE   | 15.9994 | -0.285 | 0.0022619536          | $1.21 \cdot 10^{-6}$     |
| 51 | C16 | C    | 12.0110 | -0.216 | 0.0023406244          | $4.937284 \cdot 10^{-6}$ |
| 52 | H21 | HC   | 1.0080  | 0.118  | $8.464 \cdot 10^{-5}$ | $1.5129 \cdot 10^{-8}$   |
| 53 | H22 | HC   | 1.0080  | 0.146  | $8.464 \cdot 10^{-5}$ | $1.5129 \cdot 10^{-8}$   |
| 54 | C17 | C    | 12.0110 | -0.111 | 0.0023406244          | $4.937284 \cdot 10^{-6}$ |
| 55 | H2  | HC   | 1.0080  | 0.355  | $8.464 \cdot 10^{-5}$ | $1.5129 \cdot 10^{-8}$   |
| 56 | N1  | NL   | 14.0067 | -0.063 | 0.0024364096          | $2.319529 \cdot 10^{-6}$ |
| 57 | H3  | HS14 | 1.0080  | 0.257  | 0.0                   | 0.0                      |
| 58 | H4  | HS14 | 1.0080  | 0.257  | 0.0                   | 0.0                      |
| 59 | H5  | HS14 | 1.0080  | 0.257  | 0.0                   | 0.0                      |
| 60 | C18 | C    | 12.0110 | -0.015 | 0.0023406244          | $4.937284 \cdot 10^{-6}$ |
| 61 | H6  | HC   | 1.0080  | 0.131  | $8.464 \cdot 10^{-5}$ | $1.5129 \cdot 10^{-8}$   |
| 62 | O6  | OA   | 15.9994 | -0.339 | 0.0022619536          | $1.505529 \cdot 10^{-6}$ |
| 63 | H23 | HS14 | 1.0080  | 0.093  | 0.0                   | 0.0                      |
| 64 | C19 | C    | 12.0110 | 0.008  | 0.0023406244          | $4.937284 \cdot 10^{-6}$ |
| 65 | H7  | HC   | 1.0080  | 0.122  | $8.464 \cdot 10^{-5}$ | $1.5129 \cdot 10^{-8}$   |
| 66 | C20 | C    | 12.0110 | -0.315 | 0.0023406244          | $4.937284 \cdot 10^{-6}$ |
| 67 | H24 | HC   | 1.0080  | 0.105  | $8.464 \cdot 10^{-5}$ | $1.5129 \cdot 10^{-8}$   |
| 68 | H25 | HC   | 1.0080  | 0.105  | $8.464 \cdot 10^{-5}$ | $1.5129 \cdot 10^{-8}$   |
| 69 | H26 | HC   | 1.0080  | 0.105  | $8.464 \cdot 10^{-5}$ | $1.5129 \cdot 10^{-8}$   |

Table S4: Bond stretching parameters of the DX molecule.

| Atom 1 | Atom 2 | Equilibrium bond length (nm) | Force constant ( $\text{kJ mol}^{-1} \text{nm}^{-4}$ ) |
|--------|--------|------------------------------|--------------------------------------------------------|
| H30    | O11    | 0.0971                       | $7.9547 \cdot 10^6$                                    |
| O11    | C27    | 0.1410                       | $6.5389 \cdot 10^6$                                    |
| C27    | H28    | 0.1130                       | $7.0483 \cdot 10^6$                                    |

|     |     |        |                     |
|-----|-----|--------|---------------------|
| C27 | H29 | 0.1130 | $7.0483 \cdot 10^6$ |
| C27 | C26 | 0.1510 | $3.7279 \cdot 10^6$ |
| C26 | O10 | 0.1230 | $1.6600 \cdot 10^7$ |
| C26 | C12 | 0.1530 | $7.1500 \cdot 10^6$ |
| C12 | O4  | 0.1430 | $8.1800 \cdot 10^6$ |
| C12 | C13 | 0.1530 | $7.1500 \cdot 10^6$ |
| C12 | C11 | 0.1530 | $7.1500 \cdot 10^6$ |
| O4  | H17 | 0.0971 | $7.9547 \cdot 10^6$ |
| C13 | H18 | 0.1120 | $3.7000 \cdot 10^7$ |
| C13 | H19 | 0.1120 | $3.7000 \cdot 10^7$ |
| C13 | C14 | 0.1530 | $7.1500 \cdot 10^6$ |
| C11 | H15 | 0.1130 | $7.0483 \cdot 10^6$ |
| C11 | H16 | 0.1130 | $7.0483 \cdot 10^6$ |
| C11 | C10 | 0.1480 | $5.7300 \cdot 10^6$ |
| C10 | C21 | 0.1390 | $8.6600 \cdot 10^6$ |
| C10 | C9  | 0.1430 | $8.1800 \cdot 10^6$ |
| C21 | C22 | 0.1420 | $3.2236 \cdot 10^6$ |
| C21 | C14 | 0.1500 | $8.3700 \cdot 10^6$ |
| C9  | O3  | 0.1360 | $1.0200 \cdot 10^7$ |
| C9  | C8  | 0.1400 | $8.5400 \cdot 10^6$ |
| O3  | H14 | 0.0972 | $1.9581 \cdot 10^7$ |
| C8  | C23 | 0.1410 | $6.5389 \cdot 10^6$ |
| C8  | C7  | 0.1480 | $5.7300 \cdot 10^6$ |
| C23 | C22 | 0.1390 | $8.6600 \cdot 10^6$ |
| C23 | C24 | 0.1480 | $5.7300 \cdot 10^6$ |
| C22 | O8  | 0.1380 | $1.1000 \cdot 10^7$ |
| O8  | H27 | 0.0972 | $1.9581 \cdot 10^7$ |
| C24 | O9  | 0.1250 | $1.3400 \cdot 10^7$ |
| C24 | C25 | 0.1470 | $8.7100 \cdot 10^6$ |
| C25 | C2  | 0.1410 | $6.5389 \cdot 10^6$ |
| C25 | C6  | 0.1410 | $6.5389 \cdot 10^6$ |
| C2  | C3  | 0.1410 | $6.5389 \cdot 10^6$ |
| C2  | O1  | 0.1380 | $1.1000 \cdot 10^7$ |
| C3  | H11 | 0.1100 | $1.2100 \cdot 10^7$ |
| C3  | C4  | 0.1390 | $8.6600 \cdot 10^6$ |
| C4  | H12 | 0.1100 | $1.2100 \cdot 10^7$ |

|     |     |        |                     |
|-----|-----|--------|---------------------|
| C4  | C5  | 0.1390 | $8.6600 \cdot 10^6$ |
| C5  | H13 | 0.1100 | $1.2100 \cdot 10^7$ |
| C5  | C6  | 0.1390 | $8.6600 \cdot 10^6$ |
| C6  | C7  | 0.1480 | $5.7300 \cdot 10^6$ |
| C7  | O2  | 0.1250 | $1.3400 \cdot 10^7$ |
| O1  | C1  | 0.1430 | $8.1800 \cdot 10^6$ |
| C1  | H8  | 0.1120 | $3.7000 \cdot 10^7$ |
| C1  | H9  | 0.1120 | $3.7000 \cdot 10^7$ |
| C1  | H10 | 0.1120 | $3.7000 \cdot 10^7$ |
| C14 | H1  | 0.1130 | $7.0483 \cdot 10^6$ |
| C14 | O5  | 0.1450 | $5.2319 \cdot 10^6$ |
| O5  | C15 | 0.1410 | $6.5389 \cdot 10^6$ |
| C15 | H20 | 0.1130 | $7.0483 \cdot 10^6$ |
| C15 | O7  | 0.1420 | $3.2236 \cdot 10^6$ |
| C15 | C16 | 0.1530 | $7.1500 \cdot 10^6$ |
| O7  | C19 | 0.1430 | $8.1800 \cdot 10^6$ |
| C16 | H21 | 0.1120 | $3.7000 \cdot 10^7$ |
| C16 | H22 | 0.1120 | $3.7000 \cdot 10^7$ |
| C16 | C17 | 0.1530 | $7.1500 \cdot 10^6$ |
| C17 | H2  | 0.1130 | $7.0483 \cdot 10^6$ |
| C17 | N1  | 0.1500 | $8.3700 \cdot 10^6$ |
| C17 | C18 | 0.1560 | $3.0819 \cdot 10^6$ |
| N1  | H3  | 0.1030 | $3.2991 \cdot 10^6$ |
| N1  | H4  | 0.1030 | $3.2991 \cdot 10^6$ |
| N1  | H5  | 0.1030 | $3.2991 \cdot 10^6$ |
| C18 | H6  | 0.1130 | $7.0483 \cdot 10^6$ |
| C18 | O6  | 0.1410 | $6.5389 \cdot 10^6$ |
| C18 | C19 | 0.1540 | $4.2166 \cdot 10^6$ |
| O6  | H23 | 0.0971 | $7.9547 \cdot 10^6$ |
| C19 | H7  | 0.1130 | $7.0483 \cdot 10^6$ |
| C19 | C20 | 0.1520 | $5.4300 \cdot 10^6$ |
| C20 | H24 | 0.1120 | $3.7000 \cdot 10^7$ |
| C20 | H25 | 0.1120 | $3.7000 \cdot 10^7$ |
| C20 | H26 | 0.1120 | $3.7000 \cdot 10^7$ |

---

Table S5: Angle bending parameters of the DX molecule.

| Atom 1 | Atom 2 | Atom 3 | Equilibrium angle (degree) | Force constant (kJ mol <sup>-1</sup> ) |
|--------|--------|--------|----------------------------|----------------------------------------|
| H30    | O11    | C27    | 109.50                     | 450.00                                 |
| O11    | C27    | H28    | 104.00                     | 490.00                                 |
| O11    | C27    | H29    | 110.30                     | 524.00                                 |
| O11    | C27    | C26    | 111.00                     | 530.00                                 |
| H28    | C27    | H29    | 109.60                     | 450.00                                 |
| H28    | C27    | C26    | 110.30                     | 524.00                                 |
| H29    | C27    | C26    | 108.53                     | 443.00                                 |
| C27    | C26    | O10    | 121.00                     | 685.00                                 |
| C27    | C26    | C12    | 120.00                     | 560.00                                 |
| O10    | C26    | C12    | 121.00                     | 685.00                                 |
| C26    | C12    | O4     | 109.50                     | 520.00                                 |
| C26    | C12    | C13    | 111.00                     | 530.00                                 |
| C26    | C12    | C11    | 111.00                     | 530.00                                 |
| O4     | C12    | C13    | 104.00                     | 490.00                                 |
| O4     | C12    | C11    | 109.50                     | 520.00                                 |
| C13    | C12    | C11    | 111.00                     | 530.00                                 |
| C12    | O4     | H17    | 109.50                     | 450.00                                 |
| C12    | C13    | H18    | 108.53                     | 443.00                                 |
| C12    | C13    | H19    | 109.50                     | 285.00                                 |
| C12    | C13    | C14    | 111.00                     | 530.00                                 |
| H18    | C13    | H19    | 107.60                     | 507.00                                 |
| H18    | C13    | C14    | 109.60                     | 450.00                                 |
| H19    | C13    | C14    | 109.00                     | 1680.51                                |
| C12    | C11    | H15    | 108.53                     | 443.00                                 |
| C12    | C11    | H16    | 109.50                     | 285.00                                 |
| C12    | C11    | C10    | 111.00                     | 530.00                                 |
| H15    | C11    | H16    | 106.75                     | 503.00                                 |
| H15    | C11    | C10    | 108.53                     | 443.00                                 |
| H16    | C11    | C10    | 109.00                     | 1680.51                                |
| C11    | C10    | C21    | 126.00                     | 640.00                                 |
| C11    | C10    | C9     | 120.00                     | 560.00                                 |
| C21    | C10    | C9     | 120.00                     | 560.00                                 |
| C10    | C21    | C22    | 120.00                     | 560.00                                 |

|     |     |     |        |        |
|-----|-----|-----|--------|--------|
| C10 | C21 | C14 | 120.00 | 560.00 |
| C22 | C21 | C14 | 120.00 | 560.00 |
| C10 | C9  | O3  | 115.00 | 610.00 |
| C10 | C9  | C8  | 120.00 | 560.00 |
| O3  | C9  | C8  | 126.00 | 640.00 |
| C9  | O3  | H14 | 109.50 | 450.00 |
| C9  | C8  | C23 | 120.00 | 560.00 |
| C9  | C8  | C7  | 120.00 | 560.00 |
| C23 | C8  | C7  | 120.00 | 560.00 |
| C8  | C23 | C22 | 120.00 | 560.00 |
| C8  | C23 | C24 | 120.00 | 560.00 |
| C22 | C23 | C24 | 120.00 | 560.00 |
| C21 | C22 | C23 | 120.00 | 560.00 |
| C21 | C22 | O8  | 115.00 | 610.00 |
| C23 | C22 | O8  | 126.00 | 640.00 |
| C22 | O8  | H27 | 109.50 | 450.00 |
| C23 | C24 | O9  | 120.00 | 560.00 |
| C23 | C24 | C25 | 120.00 | 560.00 |
| O9  | C24 | C25 | 121.00 | 685.00 |
| C24 | C25 | C2  | 120.00 | 560.00 |
| C24 | C25 | C6  | 120.00 | 560.00 |
| C2  | C25 | C6  | 120.00 | 560.00 |
| C25 | C2  | C3  | 120.00 | 560.00 |
| C25 | C2  | O1  | 115.00 | 610.00 |
| C3  | C2  | O1  | 126.00 | 640.00 |
| C2  | C3  | H11 | 120.00 | 505.00 |
| C2  | C3  | C4  | 120.00 | 560.00 |
| H11 | C3  | C4  | 120.00 | 505.00 |
| C3  | C4  | H12 | 120.00 | 505.00 |
| C3  | C4  | C5  | 120.00 | 560.00 |
| H12 | C4  | C5  | 120.00 | 505.00 |
| C4  | C5  | H13 | 120.00 | 505.00 |
| C4  | C5  | C6  | 120.00 | 560.00 |
| H13 | C5  | C6  | 120.00 | 505.00 |
| C25 | C6  | C5  | 120.00 | 560.00 |
| C25 | C6  | C7  | 120.00 | 560.00 |



|     |     |     |        |         |
|-----|-----|-----|--------|---------|
| C5  | C6  | C7  | 120.00 | 560.00  |
| C8  | C7  | C6  | 120.00 | 560.00  |
| C8  | C7  | O2  | 121.00 | 685.00  |
| C6  | C7  | O2  | 121.00 | 685.00  |
| C2  | O1  | C1  | 117.00 | 635.00  |
| O1  | C1  | H8  | 103.00 | 420.00  |
| O1  | C1  | H9  | 103.00 | 420.00  |
| O1  | C1  | H10 | 103.00 | 420.00  |
| H8  | C1  | H9  | 111.00 | 530.00  |
| H8  | C1  | H10 | 111.00 | 530.00  |
| H9  | C1  | H10 | 111.00 | 530.00  |
| C13 | C14 | C21 | 111.00 | 530.00  |
| C13 | C14 | H1  | 110.00 | 4763.46 |
| C13 | C14 | O5  | 109.50 | 520.00  |
| C21 | C14 | H1  | 108.00 | 465.00  |
| C21 | C14 | O5  | 109.50 | 520.00  |
| H1  | C14 | O5  | 111.00 | 530.00  |
| C14 | O5  | C15 | 116.00 | 465.00  |
| O5  | C15 | H20 | 114.00 | 1559.41 |
| O5  | C15 | O7  | 106.75 | 503.00  |
| O5  | C15 | C16 | 109.50 | 520.00  |
| H20 | C15 | O7  | 106.00 | 1733.55 |
| H20 | C15 | C16 | 111.40 | 532.00  |
| O7  | C15 | C16 | 111.00 | 530.00  |
| C15 | O7  | C19 | 109.50 | 450.00  |
| C15 | C16 | H21 | 108.00 | 465.00  |
| C15 | C16 | H22 | 108.00 | 465.00  |
| C15 | C16 | C17 | 109.50 | 520.00  |
| H21 | C16 | H22 | 109.60 | 450.00  |
| H21 | C16 | C17 | 111.00 | 530.00  |
| H22 | C16 | C17 | 111.40 | 532.00  |
| C16 | C17 | H2  | 109.00 | 1680.51 |
| C16 | C17 | N1  | 111.00 | 530.00  |
| C16 | C17 | C18 | 109.50 | 520.00  |
| H2  | C17 | N1  | 108.00 | 465.00  |
| H2  | C17 | C18 | 109.00 | 1680.51 |

|     |     |     |        |         |
|-----|-----|-----|--------|---------|
| N1  | C17 | C18 | 109.50 | 520.00  |
| C17 | N1  | H3  | 109.50 | 425.00  |
| C17 | N1  | H4  | 109.50 | 425.00  |
| C17 | N1  | H5  | 109.50 | 425.00  |
| H3  | N1  | H4  | 109.60 | 450.00  |
| H3  | N1  | H5  | 109.60 | 450.00  |
| H4  | N1  | H5  | 109.60 | 450.00  |
| C17 | C18 | H6  | 110.30 | 524.00  |
| C17 | C18 | O6  | 109.50 | 520.00  |
| C17 | C18 | C19 | 109.50 | 520.00  |
| H6  | C18 | O6  | 106.00 | 1733.55 |
| H6  | C18 | C19 | 109.60 | 450.00  |
| O6  | C18 | C19 | 115.00 | 610.00  |
| C18 | O6  | H23 | 109.50 | 450.00  |
| O7  | C19 | C18 | 109.50 | 520.00  |
| O7  | C19 | H7  | 109.00 | 1680.51 |
| O7  | C19 | C20 | 109.50 | 520.00  |
| C18 | C19 | H7  | 108.53 | 443.00  |
| C18 | C19 | C20 | 111.00 | 530.00  |
| H7  | C19 | C20 | 111.00 | 530.00  |
| C19 | C20 | H24 | 111.00 | 530.00  |
| C19 | C20 | H25 | 111.00 | 530.00  |
| C19 | C20 | H26 | 111.00 | 530.00  |
| H24 | C20 | H25 | 108.53 | 443.00  |
| H24 | C20 | H26 | 108.53 | 443.00  |
| H25 | C20 | H26 | 108.53 | 443.00  |

Table S6: Improper dihedral-angle parameters of the DX molecule.

| Atom 1 | Atom 2 | Atom 3 | Atom 4 | Equilibrium improper dihedral angle (degree) | Force constant (kJ mol <sup>-1</sup> rad <sup>-2</sup> ) |
|--------|--------|--------|--------|----------------------------------------------|----------------------------------------------------------|
| C2     | O1     | C3     | C25    | 0.00                                         | 167.36                                                   |
| C3     | C2     | C4     | H11    | 0.00                                         | 167.36                                                   |
| C4     | C3     | C5     | H12    | 0.00                                         | 167.36                                                   |
| C5     | C4     | C6     | H13    | 0.00                                         | 167.36                                                   |

|     |     |     |     |      |        |
|-----|-----|-----|-----|------|--------|
| C6  | C5  | C7  | C25 | 0.00 | 167.36 |
| C7  | C6  | O2  | C8  | 0.00 | 167.36 |
| C8  | C7  | C9  | C23 | 0.00 | 167.36 |
| C9  | C8  | O3  | C10 | 0.00 | 167.36 |
| C10 | C9  | C11 | C21 | 0.00 | 167.36 |
| C21 | C10 | C14 | C22 | 0.00 | 167.36 |
| C22 | C21 | O8  | C23 | 0.00 | 167.36 |
| C23 | C8  | C22 | C24 | 0.00 | 167.36 |
| C24 | C23 | O9  | C25 | 0.00 | 167.36 |
| C25 | C2  | C6  | C24 | 0.00 | 167.36 |
| C26 | C12 | O10 | C27 | 0.00 | 167.36 |

Table S7: Proper dihedral angle parameters

| Atom 1 | Atom 2 | Atom 3 | Atom 4 | Equilibrium proper<br>dihedral angle (degree) | Force constant<br>(kJ mol <sup>-1</sup> ) | Multiplicity |
|--------|--------|--------|--------|-----------------------------------------------|-------------------------------------------|--------------|
| H30    | O11    | C27    | C26    | 0.00                                          | 1.26                                      | 3            |
| O11    | C27    | C26    | C12    | 180.00                                        | 1.00                                      | 6            |
| O10    | C26    | C12    | C11    | 0.00                                          | 1.00                                      | 6            |
| C11    | C12    | O4     | H17    | 0.00                                          | 1.26                                      | 3            |
| C11    | C12    | C13    | C14    | 0.00                                          | 5.92                                      | 3            |
| O4     | C12    | C11    | C10    | 0.00                                          | 5.92                                      | 3            |
| C12    | C13    | C14    | O5     | 0.00                                          | 5.92                                      | 3            |
| C12    | C11    | C10    | C9     | 180.00                                        | 1.00                                      | 6            |
| C9     | C10    | C21    | C22    | 180.00                                        | 41.80                                     | 2            |
| C21    | C10    | C9     | C8     | 180.00                                        | 41.80                                     | 2            |
| C10    | C21    | C22    | C23    | 180.00                                        | 41.80                                     | 2            |
| C10    | C21    | C14    | C13    | 180.00                                        | 1.00                                      | 6            |
| C8     | C9     | O3     | H14    | 180.00                                        | 16.70                                     | 2            |
| C10    | C9     | C8     | C23    | 180.00                                        | 41.80                                     | 2            |
| C9     | C8     | C23    | C22    | 180.00                                        | 41.80                                     | 2            |
| C9     | C8     | C7     | C6     | 180.00                                        | 5.86                                      | 2            |
| C8     | C23    | C22    | C21    | 180.00                                        | 41.80                                     | 2            |
| C8     | C23    | C24    | O9     | 180.00                                        | 5.86                                      | 2            |
| C21    | C22    | O8     | H27    | 180.00                                        | 16.70                                     | 2            |
| C23    | C24    | C25    | C2     | 180.00                                        | 5.86                                      | 2            |

|     |     |     |     |        |       |   |
|-----|-----|-----|-----|--------|-------|---|
| C6  | C25 | C2  | C3  | 180.00 | 41.80 | 2 |
| C2  | C25 | C6  | C5  | 180.00 | 41.80 | 2 |
| C25 | C2  | C3  | C4  | 180.00 | 41.80 | 2 |
| C3  | C2  | O1  | C1  | 180.00 | 24.00 | 2 |
| C2  | C3  | C4  | C5  | 180.00 | 41.80 | 2 |
| C3  | C4  | C5  | C6  | 180.00 | 41.80 | 2 |
| C4  | C5  | C6  | C25 | 180.00 | 41.80 | 2 |
| C5  | C6  | C7  | O2  | 180.00 | 5.86  | 2 |
| C2  | O1  | C1  | H8  | 0.00   | 1.26  | 3 |
| C13 | C14 | O5  | C15 | 180.00 | 1.00  | 3 |
| C14 | O5  | C15 | C16 | 180.00 | 1.00  | 3 |
| O5  | C15 | O7  | C19 | 0.00   | 1.26  | 3 |
| O5  | C15 | C16 | C17 | 0.00   | 5.92  | 3 |
| C15 | O7  | C19 | C18 | 0.00   | 1.26  | 3 |
| C15 | C16 | C17 | N1  | 0.00   | 5.92  | 3 |
| C16 | C17 | N1  | H3  | 0.00   | 1.05  | 3 |
| C16 | C17 | C18 | O6  | 0.00   | 5.92  | 3 |
| C17 | C18 | O6  | H23 | 180.00 | 1.00  | 3 |
| C17 | C18 | C19 | C20 | 0.00   | 5.92  | 3 |
| C18 | C19 | C20 | H24 | 0.00   | 5.92  | 3 |

## 2.2 *n*-hexane

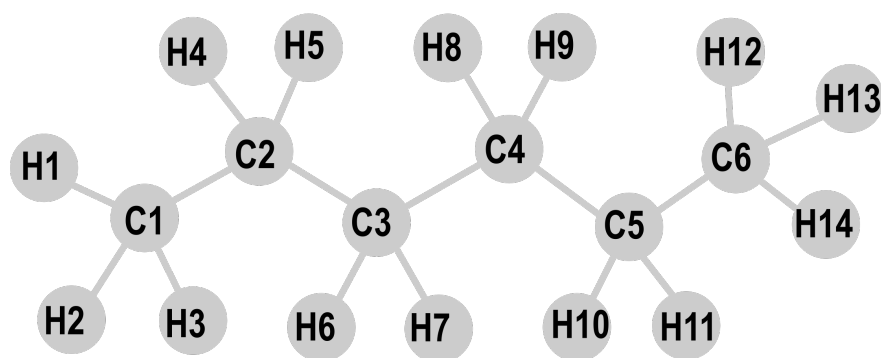

Figure S9: Atom names of *n*-hexane molecule in the force field.

Table S8: Parameters for the non bonded interactions of the *n*-hexane molecule.  $C_6$  and  $C_{12}$  are the parameters of the Lennard Jones interactions.

| Index | Atom name | Atom type | Mass (Da) | Charge (e) | $C_6$<br>(kJ mol <sup>-1</sup> nm <sup>6</sup> ) | $C_{12}$<br>(kJ mol <sup>-1</sup> nm <sup>12</sup> ) |
|-------|-----------|-----------|-----------|------------|--------------------------------------------------|------------------------------------------------------|
| 1     | H14       | HC        | 1.0080    | 0.069      | $8.464 \cdot 10^{-5}$                            | $1.5129 \cdot 10^{-8}$                               |
| 2     | C6        | C         | 12.0110   | -0.309     | 0.0023406244                                     | $4.937284 \cdot 10^{-6}$                             |
| 3     | H12       | HC        | 1.0080    | 0.069      | $8.464 \cdot 10^{-5}$                            | $1.5129 \cdot 10^{-8}$                               |
| 4     | H13       | HC        | 1.0080    | 0.069      | $8.464 \cdot 10^{-5}$                            | $1.5129 \cdot 10^{-8}$                               |
| 5     | C5        | C         | 12.0110   | 0.219      | 0.0023406244                                     | $4.937284 \cdot 10^{-6}$                             |
| 6     | H10       | HC        | 1.0080    | -0.037     | $8.464 \cdot 10^{-5}$                            | $1.5129 \cdot 10^{-8}$                               |
| 7     | H11       | HC        | 1.0080    | -0.037     | $8.464 \cdot 10^{-5}$                            | $1.5129 \cdot 10^{-8}$                               |
| 8     | C4        | C         | 12.0110   | -0.057     | 0.0023406244                                     | $4.937284 \cdot 10^{-6}$                             |
| 9     | H8        | HC        | 1.0080    | 0.007      | $8.464 \cdot 10^{-5}$                            | $1.5129 \cdot 10^{-8}$                               |
| 10    | H9        | HC        | 1.0080    | 0.007      | $8.464 \cdot 10^{-5}$                            | $1.5129 \cdot 10^{-8}$                               |
| 11    | C3        | C         | 12.0110   | -0.057     | 0.0023406244                                     | $4.937284 \cdot 10^{-6}$                             |
| 12    | H6        | HC        | 1.0080    | 0.007      | $8.464 \cdot 10^{-5}$                            | $1.5129 \cdot 10^{-8}$                               |
| 13    | H7        | HC        | 1.0080    | 0.007      | $8.464 \cdot 10^{-5}$                            | $1.5129 \cdot 10^{-8}$                               |
| 14    | C2        | C         | 12.0110   | 0.219      | 0.0023406244                                     | $4.937284 \cdot 10^{-6}$                             |
| 15    | H4        | HC        | 1.0080    | -0.037     | $8.464 \cdot 10^{-5}$                            | $1.5129 \cdot 10^{-8}$                               |
| 16    | H5        | HC        | 1.0080    | -0.037     | $8.464 \cdot 10^{-5}$                            | $1.5129 \cdot 10^{-8}$                               |
| 17    | C1        | C         | 12.0110   | -0.309     | 0.0023406244                                     | $4.937284 \cdot 10^{-6}$                             |
| 18    | H1        | HC        | 1.0080    | 0.069      | $8.464 \cdot 10^{-5}$                            | $1.5129 \cdot 10^{-8}$                               |
| 19    | H2        | HC        | 1.0080    | 0.069      | $8.464 \cdot 10^{-5}$                            | $1.5129 \cdot 10^{-8}$                               |
| 20    | H3        | HC        | 1.0080    | 0.069      | $8.464 \cdot 10^{-5}$                            | $1.5129 \cdot 10^{-8}$                               |

Table S9: Bond-stretching parameters of the *n*-hexane molecule.

| Atom 1 | Atom 2 | Equilibrium bond length (nm) | Force constant (kJ mol <sup>-1</sup> nm <sup>-4</sup> ) |
|--------|--------|------------------------------|---------------------------------------------------------|
| H14    | C6     | 0.1090                       | $1.2300 \cdot 10^7$                                     |
| C6     | H12    | 0.1090                       | $1.2300 \cdot 10^7$                                     |
| C6     | H13    | 0.1090                       | $1.2300 \cdot 10^7$                                     |
| C6     | C5     | 0.1530                       | $7.1500 \cdot 10^6$                                     |
| C5     | H10    | 0.1090                       | $1.2300 \cdot 10^7$                                     |
| C5     | H11    | 0.1090                       | $1.2300 \cdot 10^7$                                     |

|    |    |        |                     |
|----|----|--------|---------------------|
| C5 | C4 | 0.1530 | $7.1500 \cdot 10^6$ |
| C4 | H8 | 0.1100 | $1.2100 \cdot 10^7$ |
| C4 | H9 | 0.1100 | $1.2100 \cdot 10^7$ |
| C4 | C3 | 0.1530 | $7.1500 \cdot 10^6$ |
| C3 | H6 | 0.1100 | $1.2100 \cdot 10^7$ |
| C3 | H7 | 0.1100 | $1.2100 \cdot 10^7$ |
| C3 | C2 | 0.1530 | $7.1500 \cdot 10^6$ |
| C2 | H4 | 0.1090 | $1.2300 \cdot 10^7$ |
| C2 | H5 | 0.1090 | $1.2300 \cdot 10^7$ |
| C2 | C1 | 0.1530 | $7.1500 \cdot 10^6$ |
| C1 | H1 | 0.1090 | $1.2300 \cdot 10^7$ |
| C1 | H2 | 0.1090 | $1.2300 \cdot 10^7$ |
| C1 | H3 | 0.1090 | $1.2300 \cdot 10^7$ |

Table S10: Angle bending parameters of the *n*-hexane molecule.

| Atom 1 | Atom 2 | Atom 3 | Equilibrium angle (degree) | Force constant (kJ mol <sup>-1</sup> ) |
|--------|--------|--------|----------------------------|----------------------------------------|
| H14    | C6     | H12    | 107.57                     | 484.00                                 |
| H14    | C6     | H13    | 107.57                     | 484.00                                 |
| H14    | C6     | C5     | 111.40                     | 532.00                                 |
| H12    | C6     | H13    | 107.57                     | 484.00                                 |
| H12    | C6     | C5     | 111.40                     | 532.00                                 |
| H13    | C6     | C5     | 111.40                     | 532.00                                 |
| C6     | C5     | H10    | 109.50                     | 448.00                                 |
| C6     | C5     | H11    | 109.50                     | 448.00                                 |
| C6     | C5     | C4     | 111.00                     | 530.00                                 |
| H10    | C5     | H11    | 106.75                     | 503.00                                 |
| H10    | C5     | C4     | 109.50                     | 448.00                                 |
| H11    | C5     | C4     | 109.50                     | 448.00                                 |
| C5     | C4     | H8     | 109.50                     | 448.00                                 |
| C5     | C4     | H9     | 109.50                     | 448.00                                 |
| C5     | C4     | C3     | 111.00                     | 530.00                                 |
| H8     | C4     | H9     | 106.75                     | 503.00                                 |
| H8     | C4     | C3     | 109.50                     | 448.00                                 |
| H9     | C4     | C3     | 109.50                     | 448.00                                 |

|    |    |    |        |        |
|----|----|----|--------|--------|
| C4 | C3 | H6 | 109.50 | 448.00 |
| C4 | C3 | H7 | 109.50 | 448.00 |
| C4 | C3 | C2 | 111.00 | 530.00 |
| H6 | C3 | H7 | 106.75 | 503.00 |
| H6 | C3 | C2 | 109.50 | 448.00 |
| H7 | C3 | C2 | 109.50 | 448.00 |
| C3 | C2 | H4 | 109.50 | 448.00 |
| C3 | C2 | H5 | 109.50 | 448.00 |
| C3 | C2 | C1 | 111.00 | 530.00 |
| H4 | C2 | H5 | 106.75 | 503.00 |
| H4 | C2 | C1 | 109.50 | 448.00 |
| H5 | C2 | C1 | 109.50 | 448.00 |
| C2 | C1 | H1 | 111.40 | 532.00 |
| C2 | C1 | H2 | 111.40 | 532.00 |
| C2 | C1 | H3 | 111.40 | 532.00 |
| H1 | C1 | H2 | 107.57 | 484.00 |
| H1 | C1 | H3 | 107.57 | 484.00 |
| H2 | C1 | H3 | 107.57 | 484.00 |

Table S11: Proper dihedral angle parameters of the *n*-hexane molecule.

| Atom 1 | Atom 2 | Atom 3 | Atom 4 | Equilibrium proper<br>dihedral angle (degree) | Force constant<br>(kJ mol <sup>-1</sup> ) | Multiplicity |
|--------|--------|--------|--------|-----------------------------------------------|-------------------------------------------|--------------|
| C6     | C5     | C4     | C3     | 0.00                                          | 5.92                                      | 3            |
| H12    | C6     | C5     | C4     | 0.00                                          | 5.92                                      | 3            |
| C5     | C4     | C3     | C2     | 0.00                                          | 5.92                                      | 3            |
| C4     | C3     | C2     | C1     | 0.00                                          | 5.92                                      | 3            |
| C3     | C2     | C1     | H1     | 0.00                                          | 5.92                                      | 3            |





## Bibliography

- [1] R. Kiraly and R. B. Martin, *Inorg. Chim. Acta*, 1982, **67**, 13–18.
- [2] K. Koziara, M. Stroet, A. Malde and A. Mark, *J. Comput. Aid. Molec. Design*, 2014, **28**, 221–233.
- [3] M. J. Abraham, T. Murtola, R. Schulz, S. Páll, J. C. Smith, B. Hess and E. Lindahl, *SoftwareX*, 2015, **1-2**, 19–25.
- [4] N. Schmid, A. Eichenberger, A. Choutko, S. Riniker, M. Winger, A. Mark and W. Van Gunsteren, *Eur. Biophys. J.*, 2011, **40**, 843–856.
